# Supplementary material
Source: publisher figshare collection journal article supplement (https://springernature.figshare.com/ndownloader/files/15588863)
Supplement: Supplementary file 1 [file 15588863]

Table A2 LNG terminals in China (2017)

| Name | Province | Import capability  (million tons/year) | Status |
| --- | --- | --- | --- |
| CNOOC-Tianjin | Tianjin | 2.2 | In operation |
| Caofeidian | Hebei | 6.5 | In operation |
| Dalian | Liaoning | 3 | In operation |
| Yangshan | Shanghai | 5.5 | In operation |
| Rudong | Jiangsu | 3.5 | In operation |
| Qidong | Jiangsu | 2.1 | In operation |
| Ningbo | Zhejiang | 3 | In operation |
| Putian | Fujian | 6.3 | In operation |
| Qingdao | Shandong | 3 | In operation |
| Dapeng | Guangdong | 6.57 | In operation |
| Zhuhai | Guangdong | 3.5 | In operation |
| Yuedong | Guangdong | 2 | In operation |
| Dongguan | Guangdong | 1 | In operation |
| Beihai | Guangxi | 3 | In operation |
| Yangpu | Hainan | 3 | In operation |
| Sinopec-Tianjin | Tianjin | 3 | Under-construction |
| Zhoushan | Zhejiang | 3 | Under-construction |
| Diefu | Guangdong | 3 | Under-construction |
| Jieyang | Guangdong | 2 | Under-construction |
| Wenzhou | Zhejiang | 3 | Planned |
| Zhangzhou | Fujian | 3 | Planned |
